# Supplementary material
Source: Springer Nature journal article supplement (https://www.springermedizin.de/resource/supplementary/12967_2009_332_MOESM6_ESM.pdf/9576238)

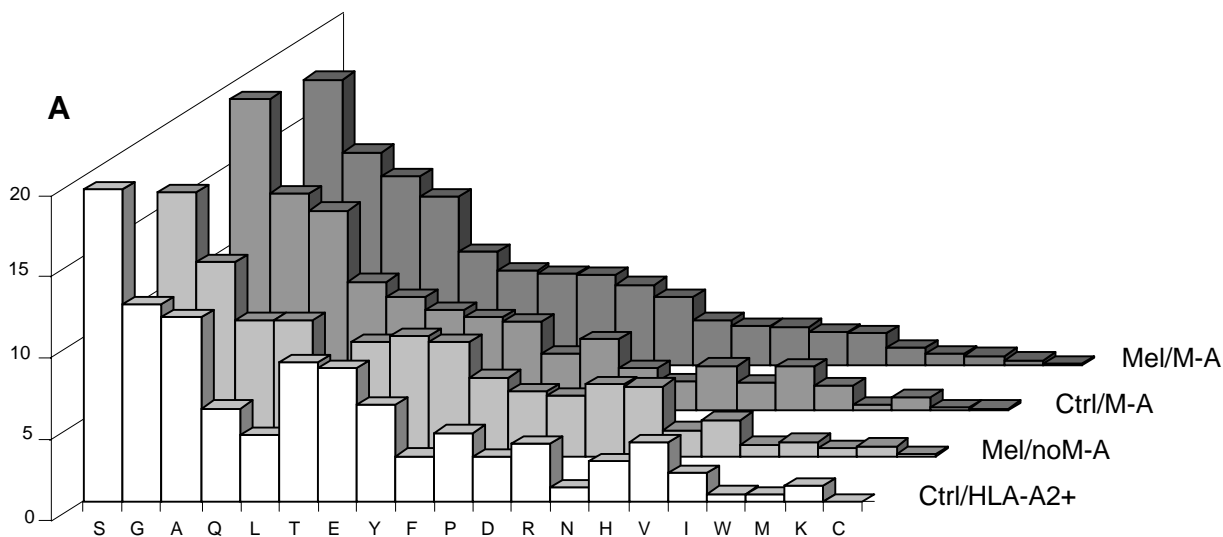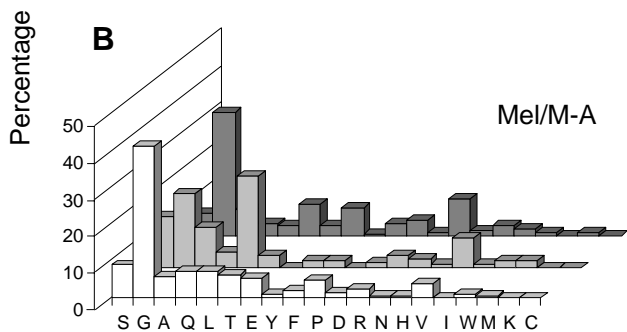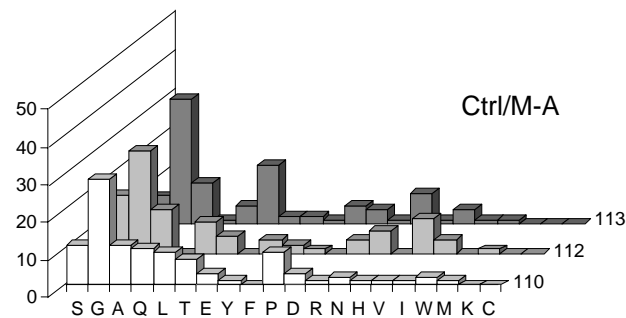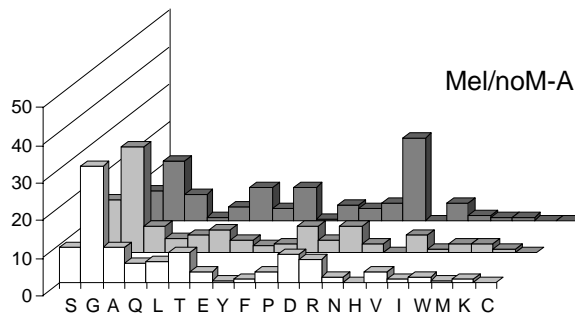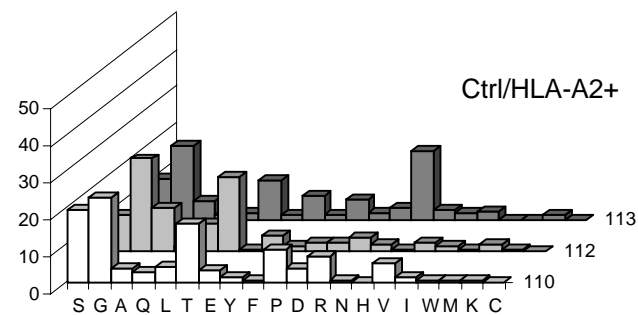

Amino acids (single-letter code)

Supplement: MOESM6 [file 9576238]
